# Supplementary material for: Bioassay-guided isolation and identification of antidiabetic compounds from Garcinia cowa leaf extract
Source: PubMed Central journal article supplement — Heliyon. 2020 Apr 25;6(4):e03625. doi: 10.1016/j.heliyon.2020.e03625 (PMC7184531; doi:10.1016/j.heliyon.2020.e03625), 2020-04-25
Supplement: mmc1.pdf [file mmc1.pdf]

## Supplementary Material

### **Bioassay-guided isolation and identification of antidiabetic compounds from *Garcinia cowa* leaf extract**

Piyaporn Phukhatmuen<sup>a</sup>, Achara Raksat<sup>a</sup>, Surat Laphookhieo<sup>a</sup>, Rawiwan Charoensup<sup>b,c</sup>, Thidarat Duangyod,<sup>b,c</sup> Wisanu Maneerat\*<sup>a,c</sup>

<sup>a</sup> *Center of Chemical Innovation for Sustainability (CIS) and School of Science, Mae Fah Luang University, Chiang Rai 57100, Thailand*

<sup>b</sup> *School of Integrative Medicine, Mae Fah Luang University, Chiang Rai 57100, Thailand*

<sup>c</sup> *Medicinal Plant Innovation Center of Mae Fah Luang University, Chiang Rai 57100, Thailand*

\*E-mail: [wisanu.man@mfu.ac.th](mailto:wisanu.man@mfu.ac.th)

\* Corresponding Author: tel.: +66-5391-6792; e-mail address: [wisanu.man@mfu.ac.th](mailto:wisanu.man@mfu.ac.th)

**Table of Contents**

|                   |                                                                                             |   |
|-------------------|---------------------------------------------------------------------------------------------|---|
| <b>Figure S1</b>  | <sup>1</sup> H NMR spectrum (400 MHz, CDCl <sub>3</sub> ) of garciniacowone K ( <b>1</b> )  | 3 |
| <b>Figure S2</b>  | Expanded <sup>1</sup> H NMR spectrum of garciniacowone K ( <b>1</b> )                       | 3 |
| <b>Figure S3</b>  | <sup>13</sup> C NMR spectrum (100 MHz, CDCl <sub>3</sub> ) of garciniacowone K ( <b>1</b> ) | 4 |
| <b>Figure S4</b>  | Expanded <sup>13</sup> C NMR spectrum of garciniacowone K ( <b>1</b> )                      | 4 |
| <b>Figure S5</b>  | DEPT 135 spectrum of garciniacowone K ( <b>1</b> )                                          | 5 |
| <b>Figure S6</b>  | Expanded DEPT 135 spectrum of garciniacowone K ( <b>1</b> )                                 | 5 |
| <b>Figure S7</b>  | COSY spectrum of garciniacowone K ( <b>1</b> )                                              | 6 |
| <b>Figure S8</b>  | HSQC spectrum of garciniacowone K ( <b>1</b> )                                              | 6 |
| <b>Figure S9</b>  | HMBC spectrum of garciniacowone K ( <b>1</b> )                                              | 7 |
| <b>Figure S10</b> | NOESY spectrum of garciniacowone K ( <b>1</b> )                                             | 7 |
| <b>Figure S11</b> | HRESITOFMS spectrum of garciniacowone K ( <b>1</b> )                                        | 8 |

ip9\_190416\_2.3.fid  
GEP20\_CDCl3\_400

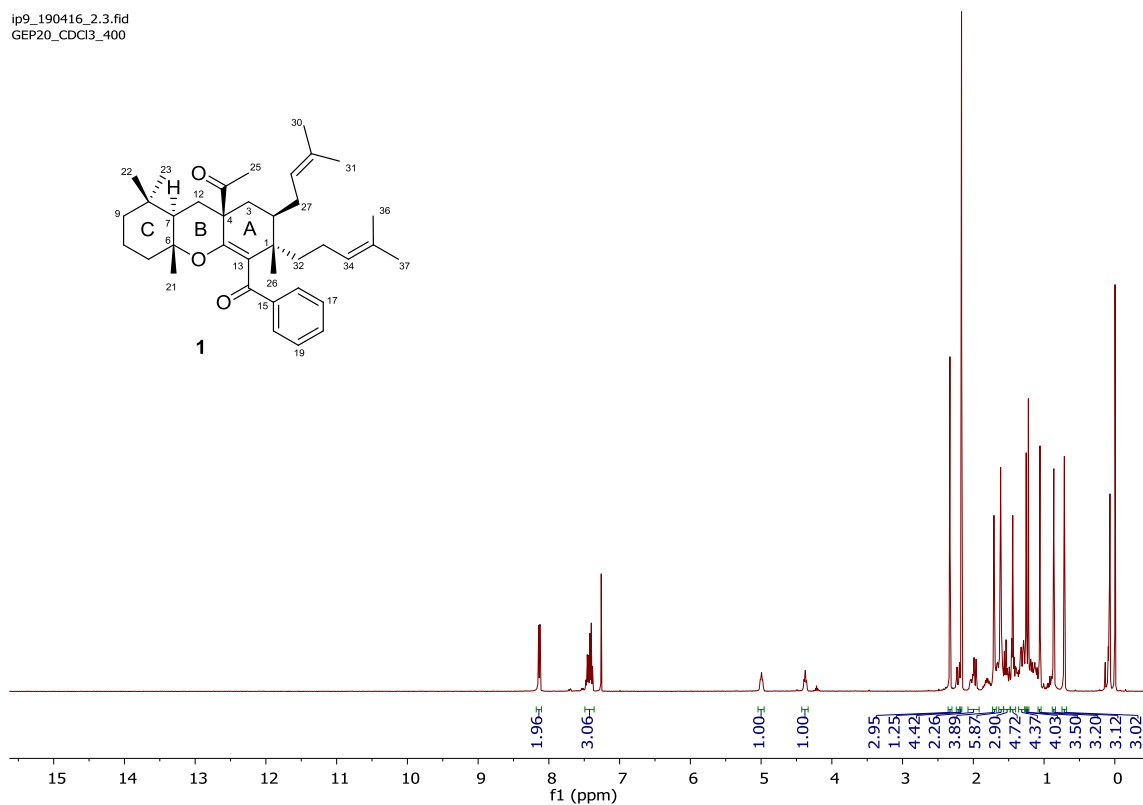

Figure S1.  $^1\text{H}$  NMR spectrum (500 MHz,  $\text{CDCl}_3$ ) of garciniacowone K (1).

ip9\_190416\_2.3.fid  
GEP20\_CDCl3\_400

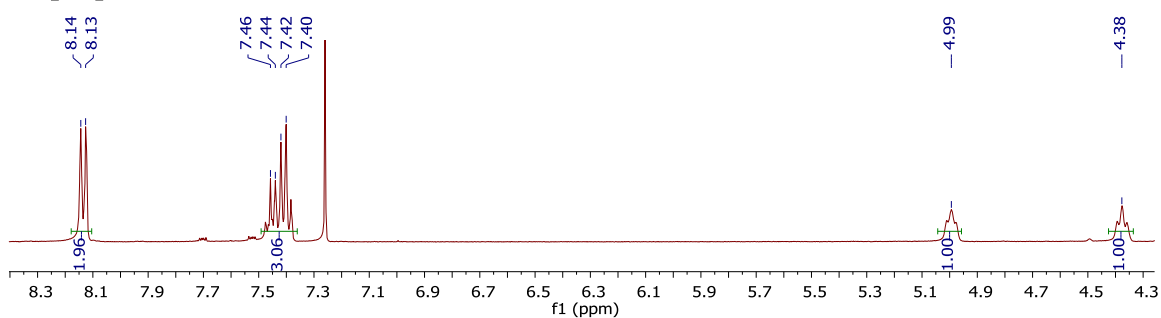

ip9\_190416\_2.3.fid  
GEP20\_CDCl3\_400

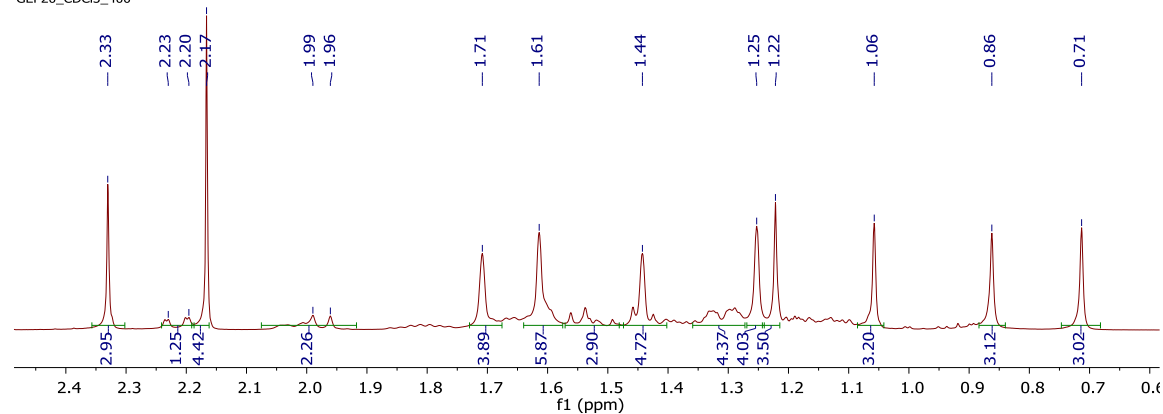

Figure S2. Expanded  $^1\text{H}$  NMR spectrum (500 MHz,  $\text{CDCl}_3$ ) of garciniacowone K (1).

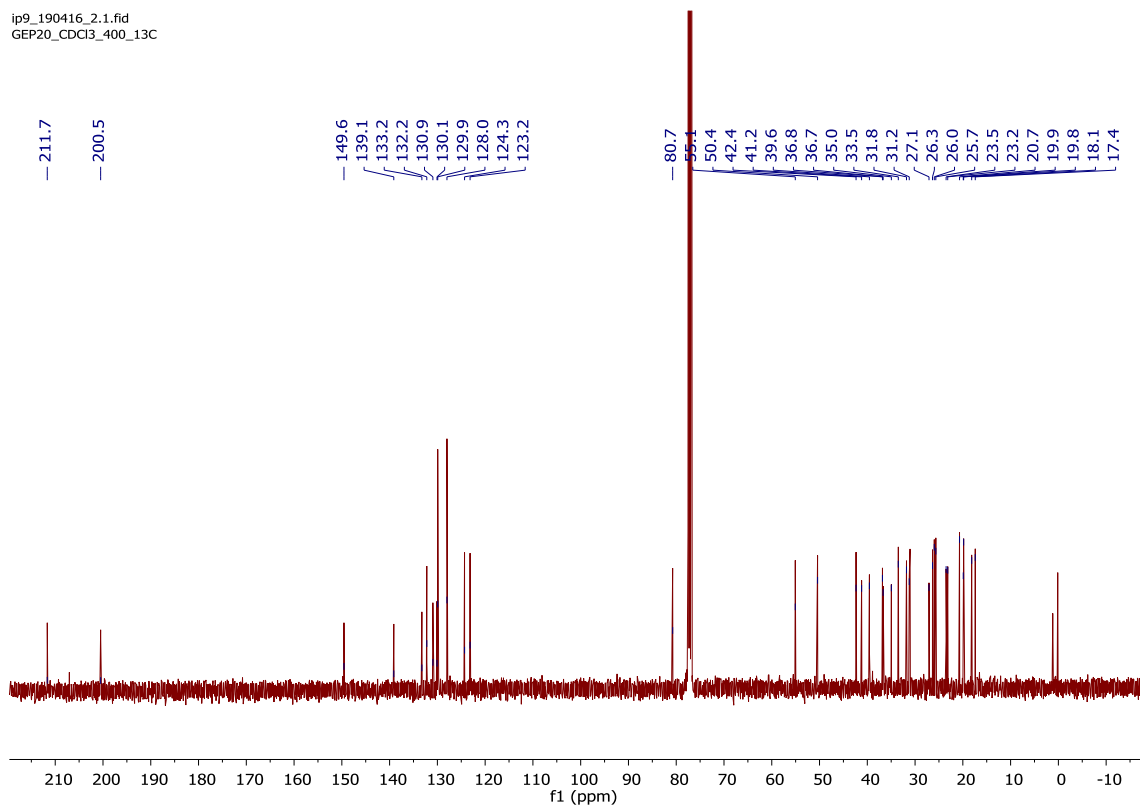

**Figure S3.**  $^{13}\text{C}$  NMR spectrum (100 MHz,  $\text{CDCl}_3$ ) of garciniacowone K (**1**).

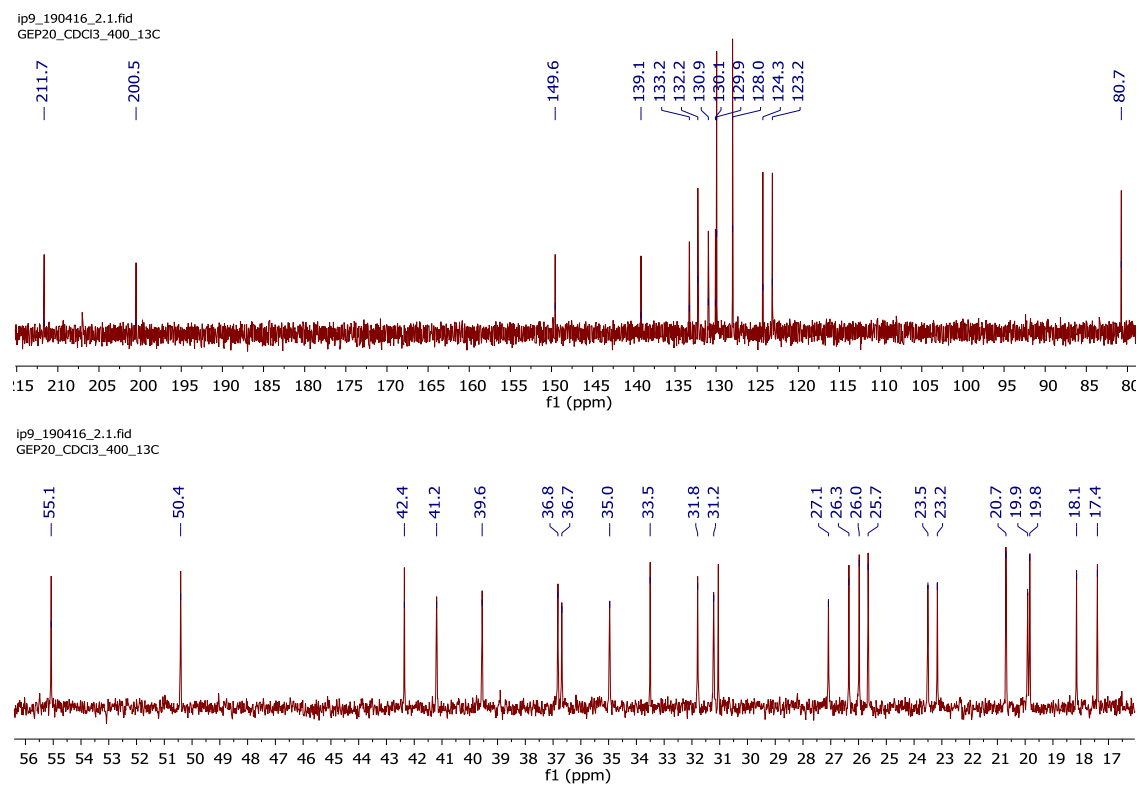

**Figure S4.** Expanded  $^{13}\text{C}$  NMR spectrum of garciniacowone K (**1**).

ip9\_190416\_2.2.fid  
GEP20\_CDCl3\_400\_DEPT135

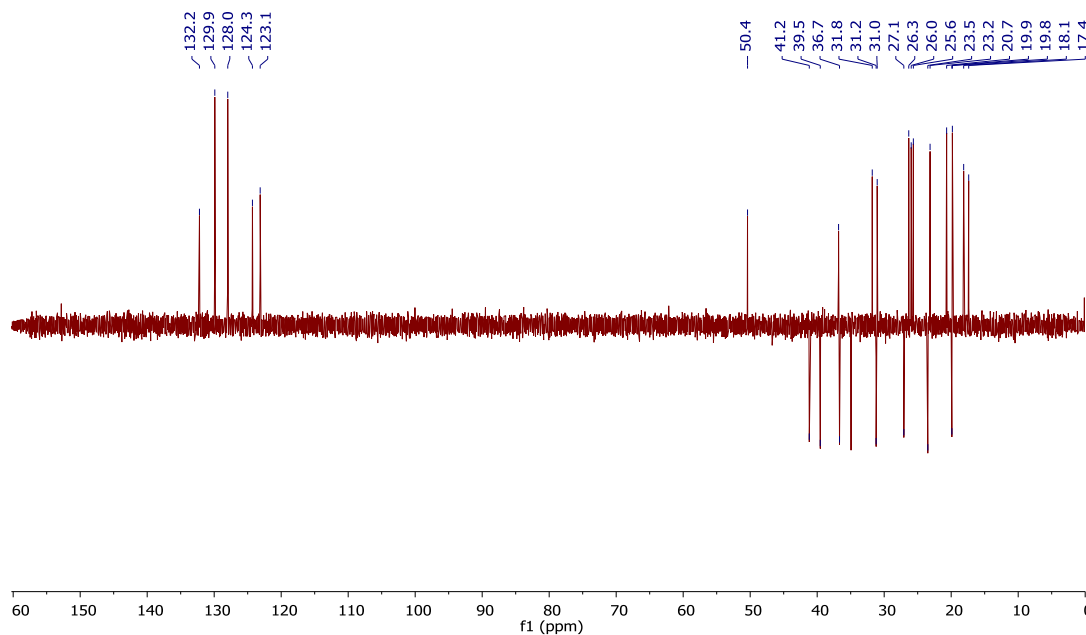

Figure S5. DEPT 135 spectrum of garciniacowone K (1).

ip9\_190416\_2.2.fid  
GEP20\_CDCl3\_400\_DEPT135

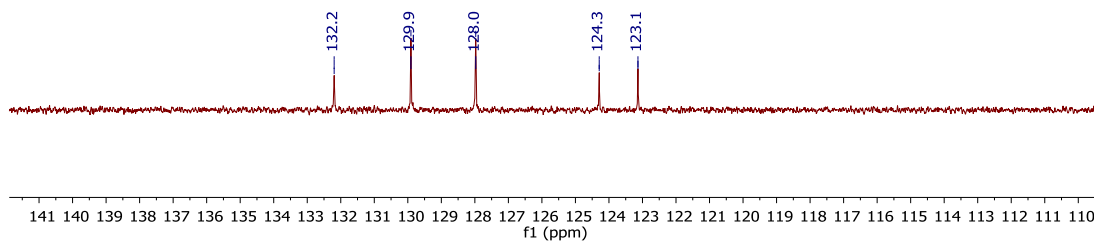

ip9\_190416\_2.2.fid  
GEP20\_CDCl3\_400\_DEPT135

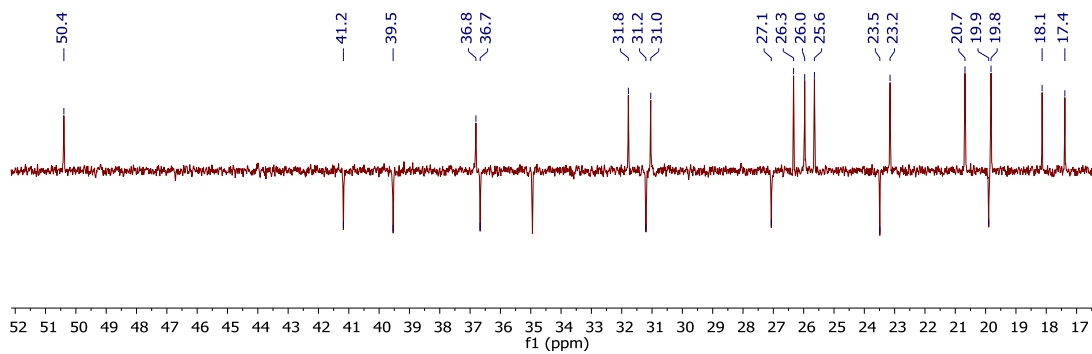

Figure S6. Expanded DEPT 135 spectrum of garciniacowone K (1).

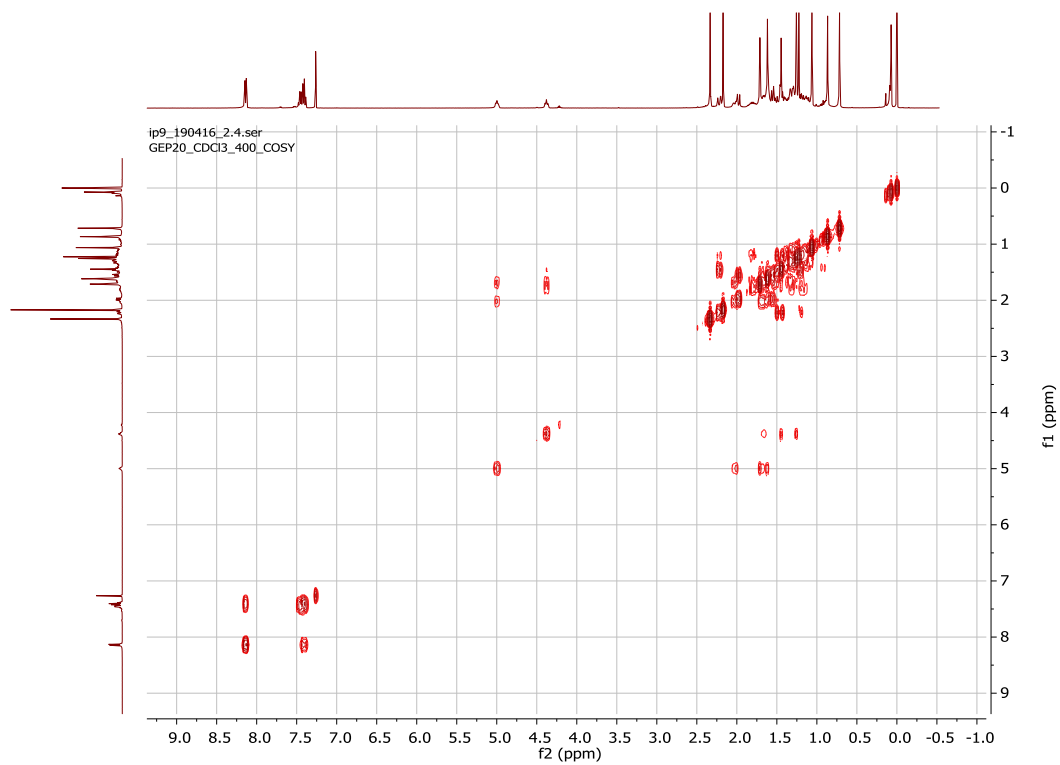

**Figure S7.** COSY spectrum of garciniacowone K (**1**)

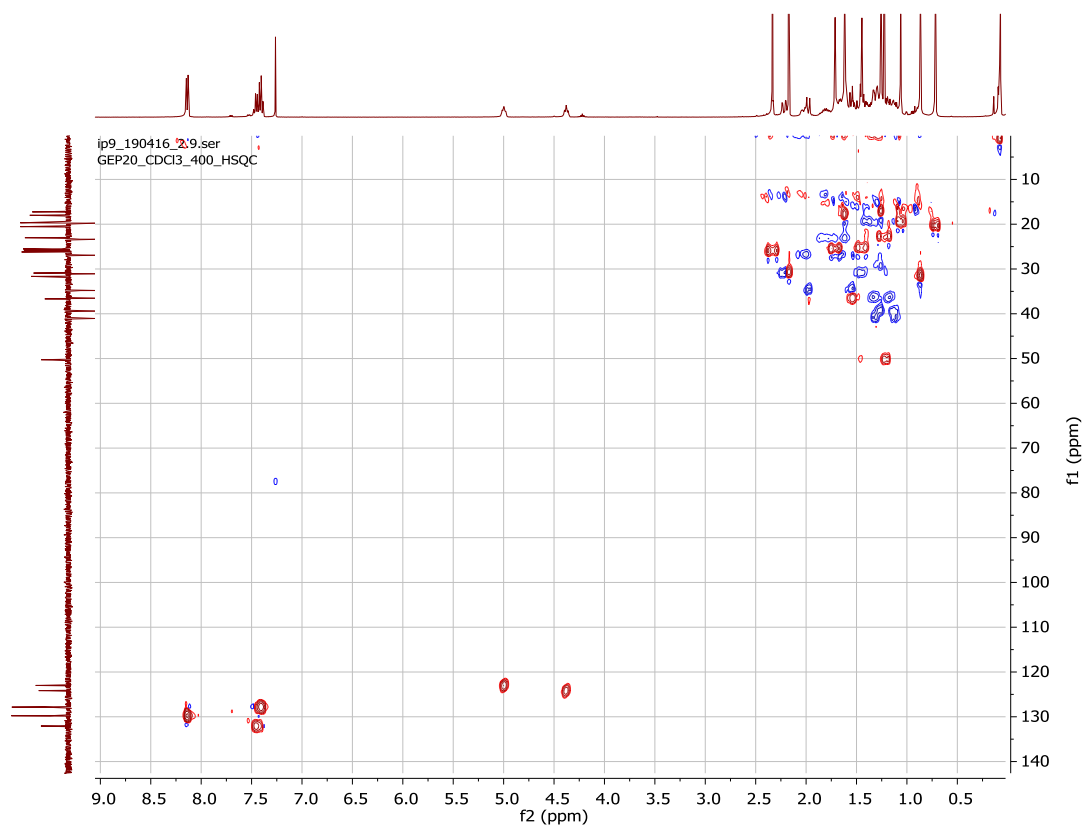

**Figure S8.** HSQC spectrum of garciniacowone K (**1**)

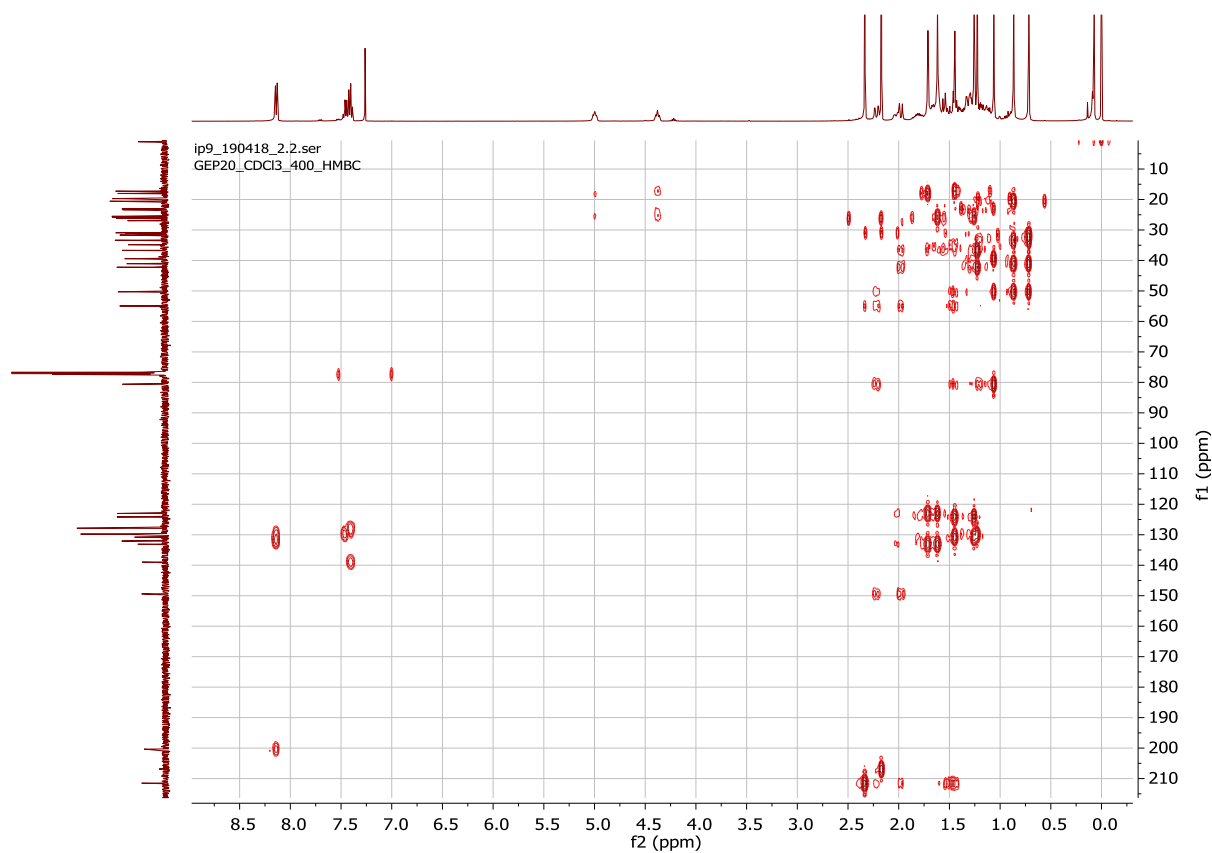

**Figure S9.** HMBC spectrum of garciniacowone K (**1**).

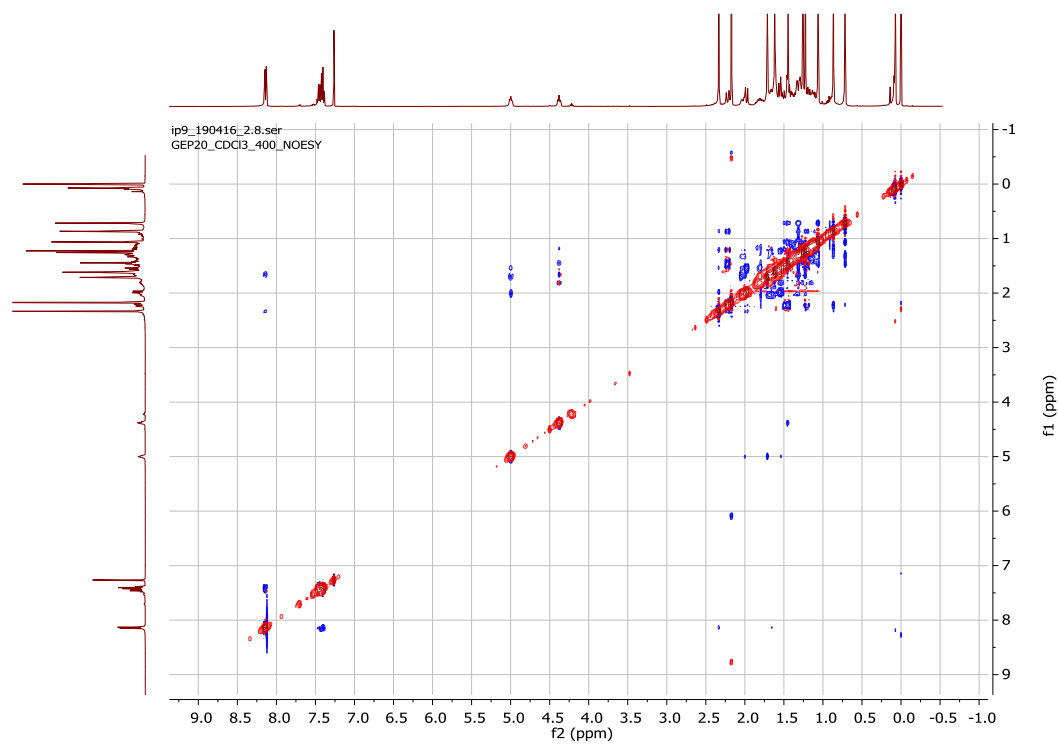

**Figure S10.** NOESY spectrum of garciniacowone K (**1**).

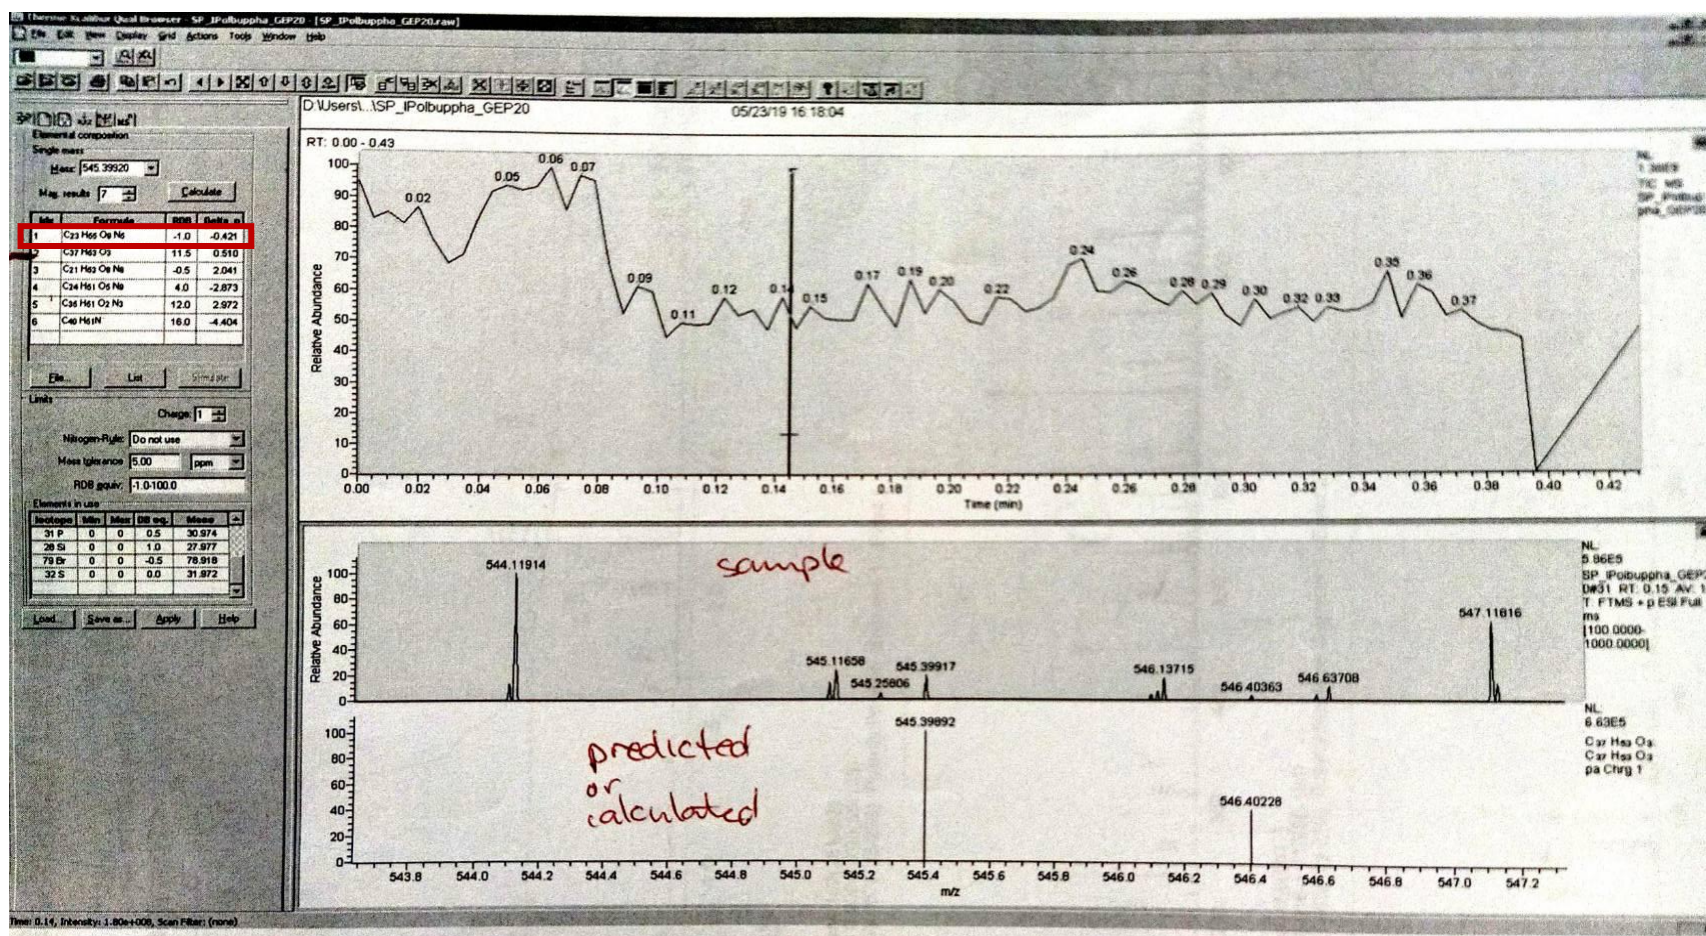

Figure S11. HRESITOFMS spectrum of garciniacowone K (1).
